# Supplementary material for: Physical and photocatalytic properties of sprayed Dy doped ZnO thin films under sunlight irradiation for degrading methylene blue
Source: Royal Society of Chemistry journal article supplement (doi:10.1039/d1ra03967a), 2021-01-01
Supplement: d1ra03967a1.pdf [file d1ra03967a1.pdf]

## Supporting information for:

### Physical and photocatalytic properties of sprayed Dy doped ZnO thin films under sunlight irradiation for degrading methylene blue

G. El Fidha <sup>a,b</sup>, N. Bitri <sup>b</sup>, F. Chaabouni <sup>b</sup>, S. Acosta <sup>c</sup>, F. Güell <sup>d</sup>, C. Bittencourt <sup>c</sup>, J. Casanova-Chafer <sup>e</sup>, E. Llobet <sup>e</sup>

<sup>a</sup> Université de Tunis, École nationale supérieure d'ingénieurs de Tunis, Avenue Taha Hussein Montfleury, 1008 Tunis, Tunisie

<sup>b</sup> Université de Tunis El Manar, Ecole Nationale d'Ingénieurs de Tunis, Laboratoire de Photovoltaïque et matériaux semi-conducteurs, 1002 Tunis, Tunisie

<sup>c</sup> Chimie des Interactions Plasma-Surface (ChIPS), Research Institute for Materials Science and Engineering, Université de Mons, 7000, Mons, Belgium

<sup>d</sup> ENFOCAT-IN2UB, Universitat de Barcelona, C/Marti i Franquès 1, 08028 Barcelona, Spain

<sup>e</sup> MINOS, Universitat Rovira i Virgili, Avda. Països Catalans, 26, 43007, Tarragona, Spain

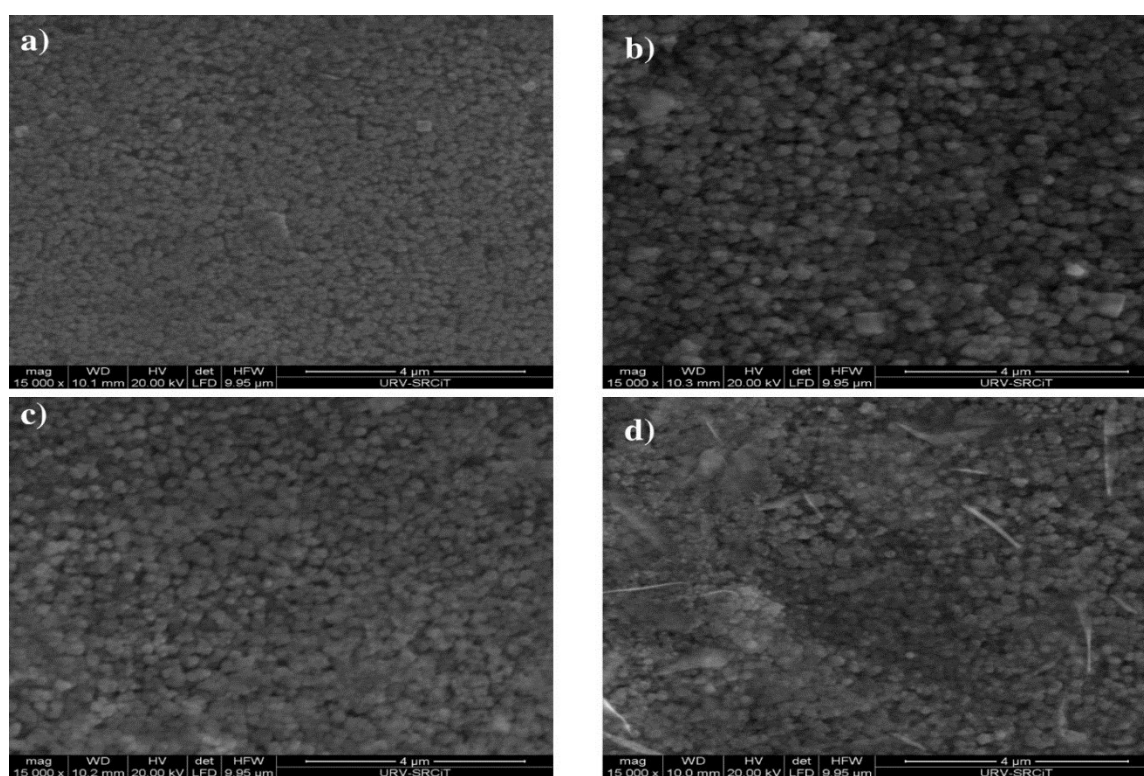

**Figure S.1:** SEM images of ZnO doped and undoped thin films: (a): Pure, (b) ZnO:Dy 2%,(c) ZnO : Dy4%, (d) ZnO : Dy 6%. All the films show dense and spherical structure strongly agglomerated. These results are consistent with the results of AFM.

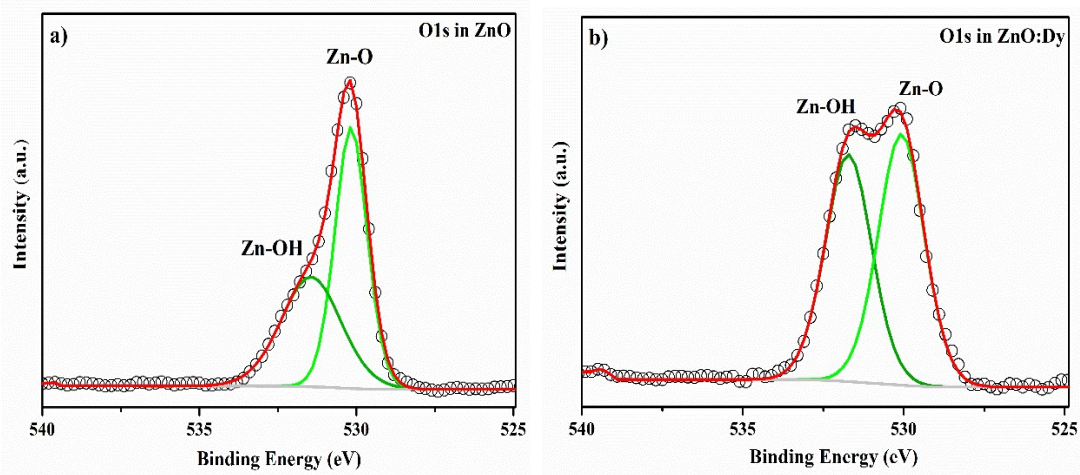

**Figure S.2:** O 1s peak analysis for the pure ZnO sample (a) and 6% doped Dy-ZnO (b).

Two main peaks are observed at 530.0 eV and 531.8 eV which are attributed to lattice oxygen of Zn-O and Zn-OH groups (defective ZnO), respectively.

**Table S.1:** XPS quantification expressed in at.%.

| Sample          | Oxygen | Zinc | Dysprosium |
|-----------------|--------|------|------------|
| Pure ZnO        | 48.7   | 51.3 | -          |
| 6% doped Dy-ZnO | 57.0   | 38.0 | 6.0        |

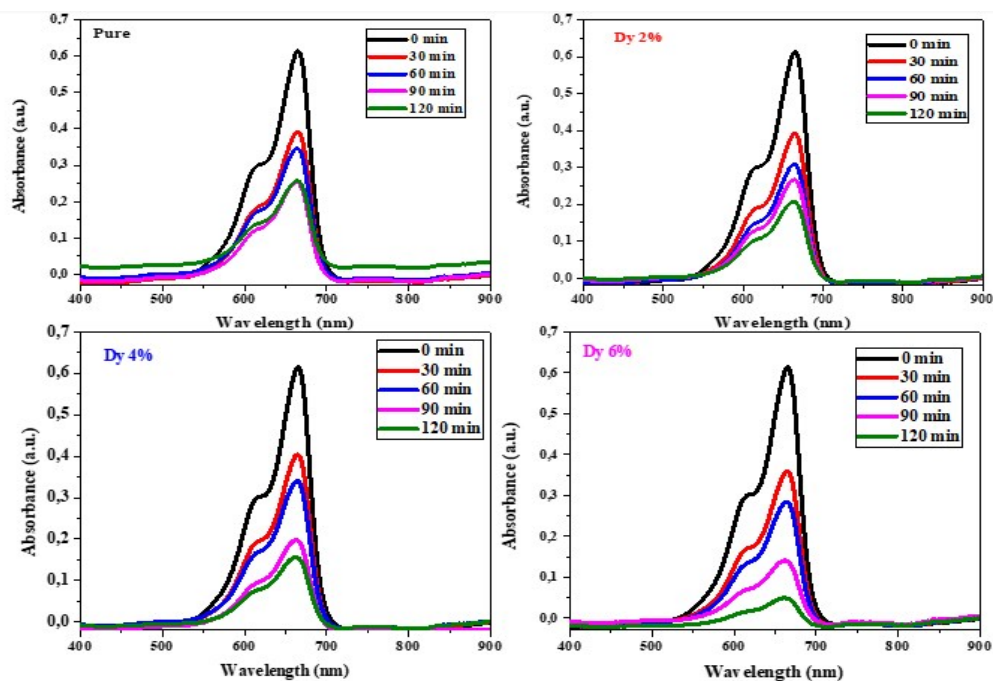

**Figure S.3:** Absorption spectra of MB after solar irradiation for 2 hours using the Dy doped ZnO thin films contents (first run)

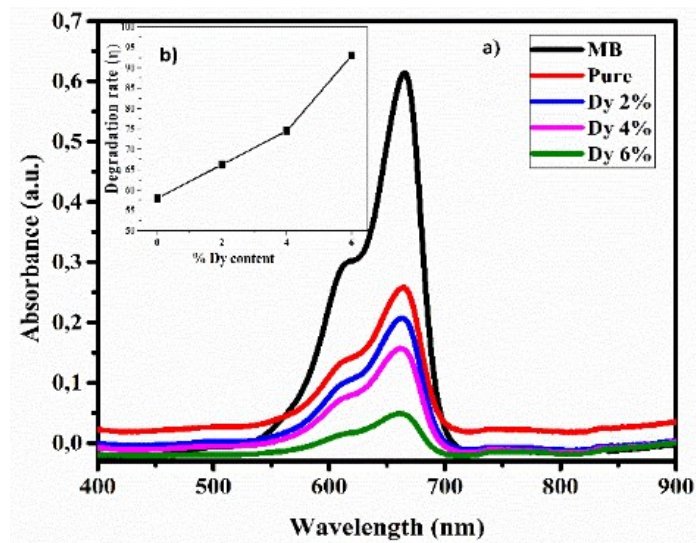

**Figure S.3:** Absorption spectra of MB after solar irradiation for 2 hours using the Dy doped ZnO thin films at various Dy contents.

**Table S. 2.** Comparison of photocatalytic activities of ZnO-doped rare earths materials for degrading dyes.

| Photocatalyst              | Method of elaboration  | Sources of Irradiation | Dye           | Degradation efficiency (%) -Time (min)              | Ref.      |
|----------------------------|------------------------|------------------------|---------------|-----------------------------------------------------|-----------|
| Sm-ZnO                     | chemical precipitation | Visible lamp           | MB            | 94.94% - 60 min                                     | 1         |
| ZnO-Sm<br>ZnO-Er<br>ZnO-La | electrospinning        | UV-light               | Congo-Red dye | 84.59- 240 min<br>78.86 - 240 min<br>73.23- 240 min | 2         |
| ZnO-Gd                     | Co-precipitation       | Visible light          | MB            | 93% - 90min                                         | 3         |
| Dy-ZnO                     | sonochemical method.   | UV light               | MB            | 98% - 300min                                        | 4         |
| Dy- ZnO                    | Combustion method      | UV light               | DR-31         | 99.6 - 60min                                        | 5         |
| Dy-ZnO                     | Spray Pyrolysis        | Solar irradiation      | MB            | 92% - 120min                                        | This work |

## References

- [1]: Sukriti, P. Chand and V. Singh, J. Rare Earths, 2020, **38**, 29-38.
- [2] : P. Pascariu, C. Cojocaru, N. Olaru, P. Samoila, A. Airinej, M.Lgnat, L. Sacarescu and D.Timpu, J. Environ. Manage, 2019, **239**, 225-234.
- [3]: S. Selvaraj, M. K. Mohan, M. Navaneethan, S. Ponnusamy and C. Muthamizhchelvan, Mater. Sci. Semicond. Process., 2019, **103**, 104622.
- [4]: O. Yayapao, T. Thongtem, A. Phuruangrat and S. Thongtem, J. Alloys Compd., 2013, **576**, 72-79.
- [5]: S. Bhatia, N. Verma and R. Kumar, J. Alloys Compd. , 2017, **726**, 1274-1285.
